# Supplementary material
Source: publisher figshare collection journal article supplement (https://tandf.figshare.com/ndownloader/files/31079763)
Supplement: Supplementary file 1 [file 31079763]

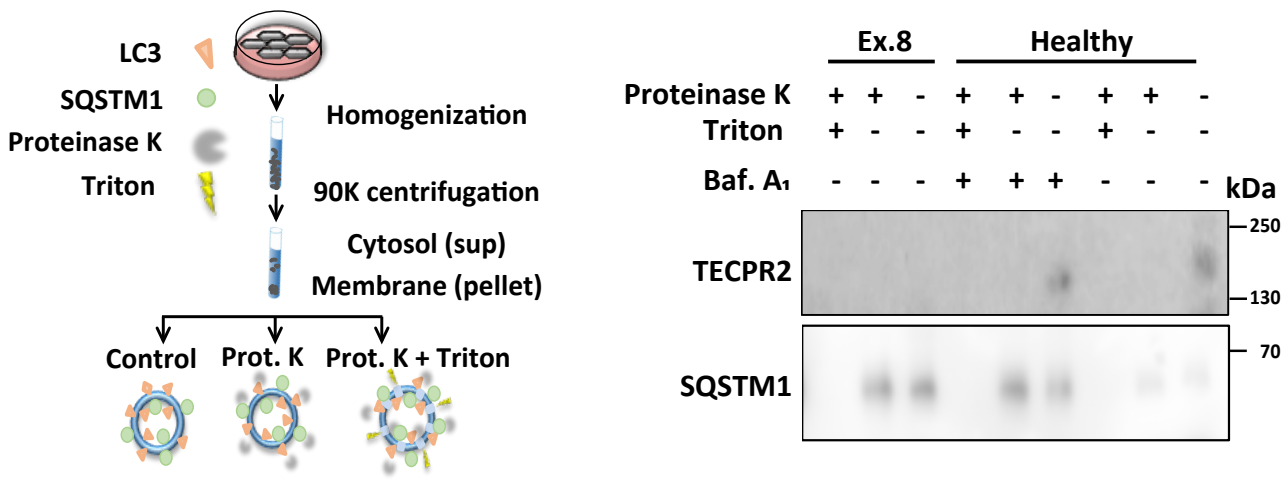

**Figure S4** - Estimation of autophagosomes closure in SPG49 derived cells. The membrane fraction of primary fibroblast cells derived from healthy individual and SPG49 patient with a mutation on exon 8 (Ex.8) was subjected to proteinase K and Triton X-100 treatments as described in Materials and Methods, and represented in the scheme (left panel).
