# Supplementary material
Source: publisher figshare collection journal article supplement (https://tandf.figshare.com/ndownloader/files/31079763)
Supplement: Supplementary file 2 [file 31079763]

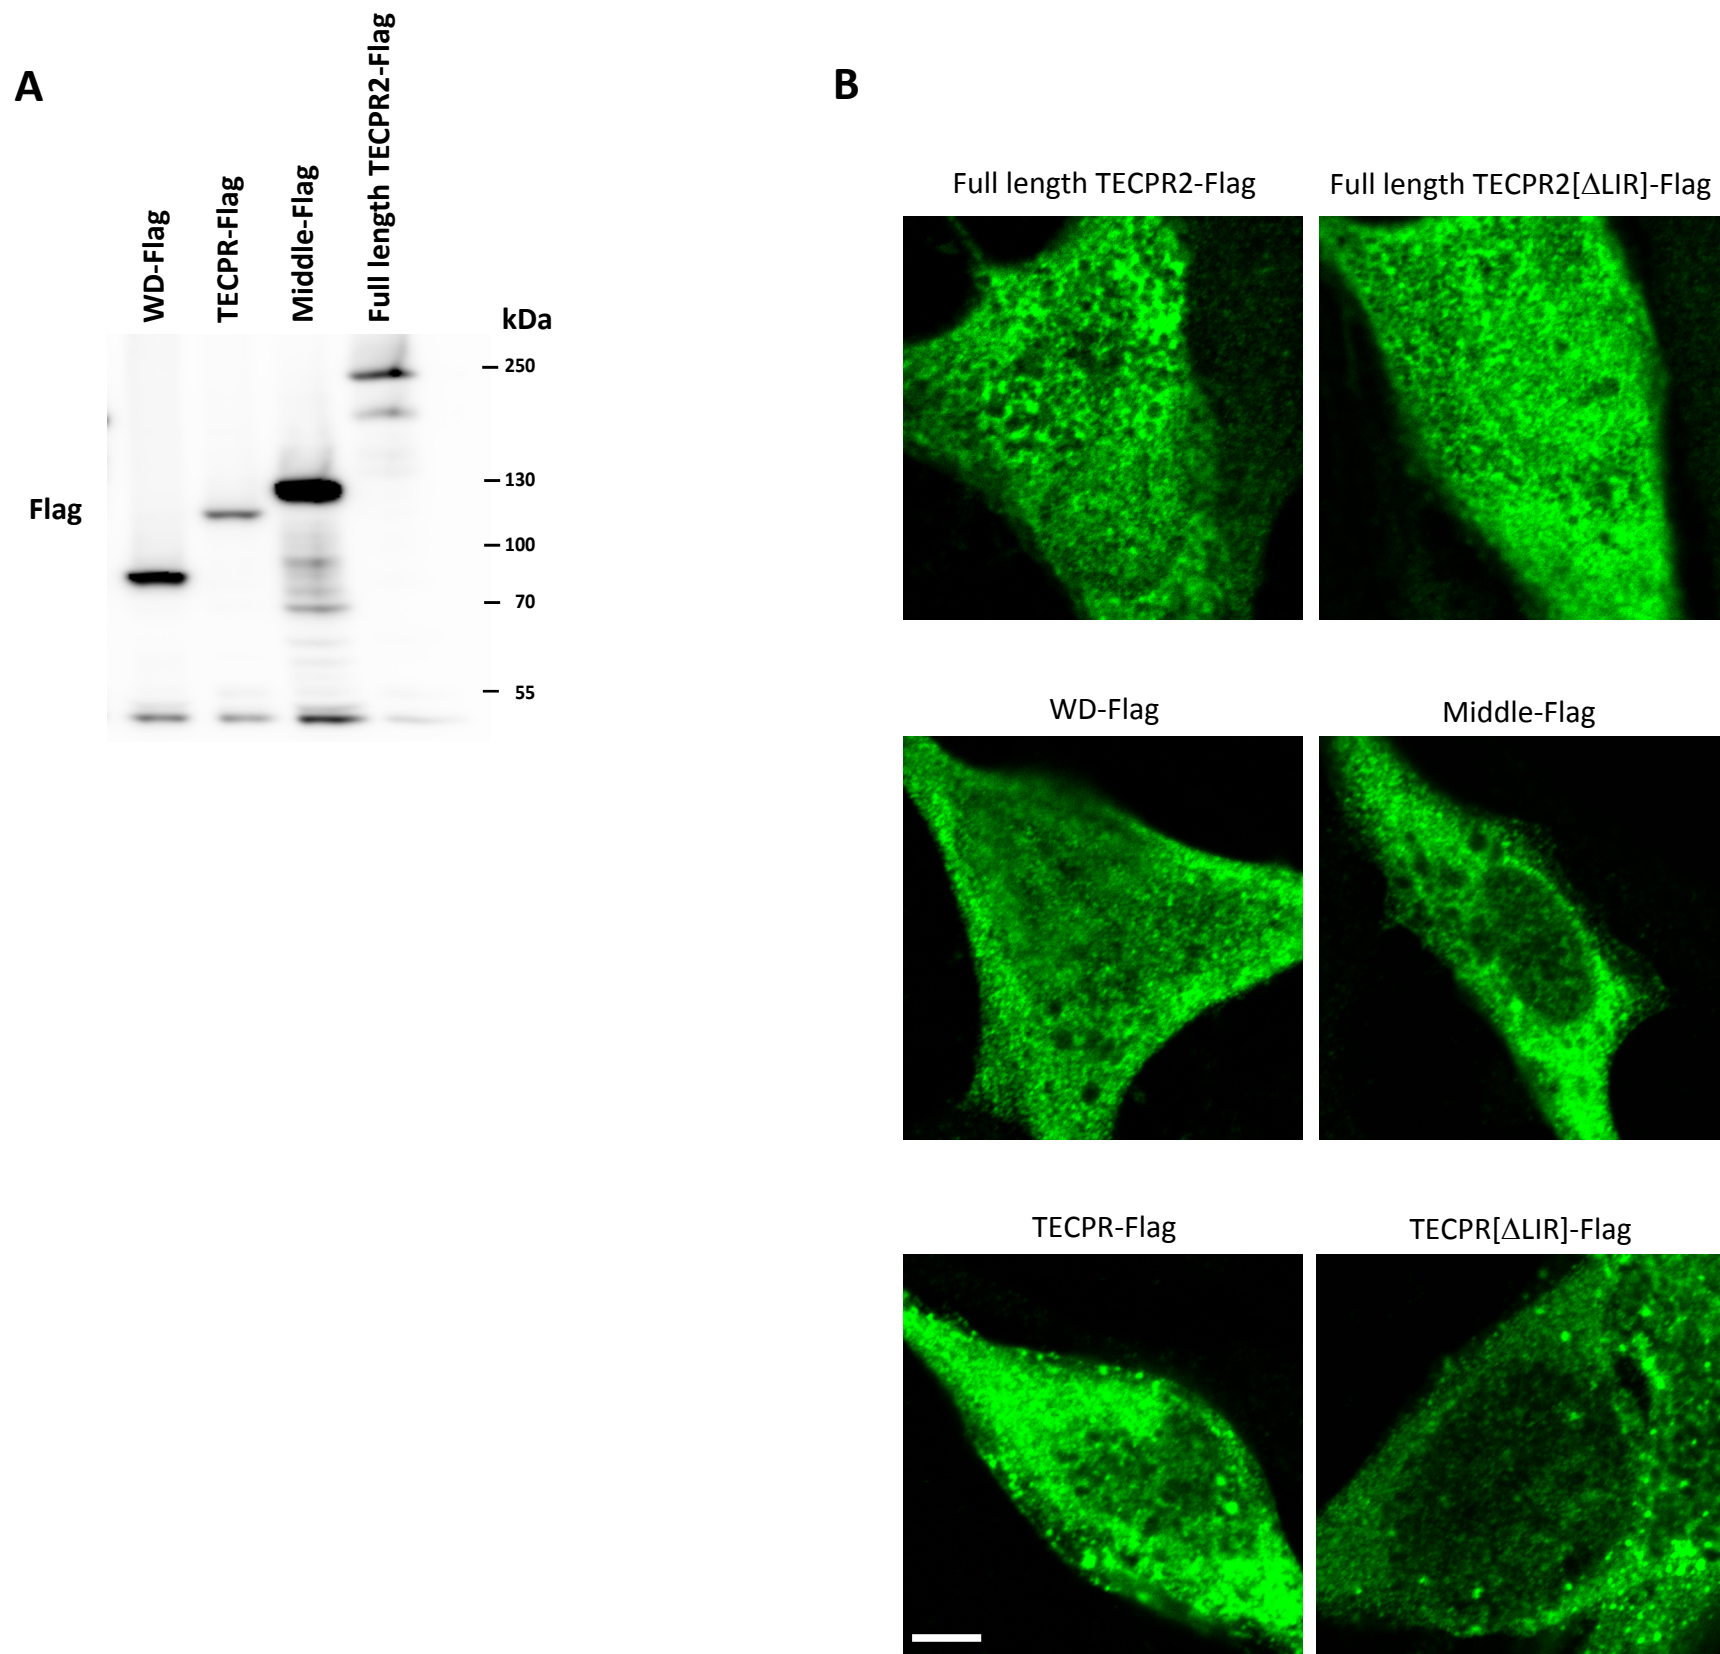

**Figure S6** - The TECPR domain of TECPR2 is sufficient for alleviating basal accumulation of autophagosomes in SPG49 patient fibroblasts. HeLa cells were transfected with carboxy-terminal Flag tagged constructs of full length or different domains of *TECPR2* by JetPrime transfection reagent for 48 h. Ectopic expression of different domains was evaluated by probing the Flag tag in **(A)** immunoblot, or **(B)** immunostaining and confocal microscopy, scale bar: 20  $\mu$ m.
