# Supplementary material
Source: publisher figshare collection journal article supplement (https://tandf.figshare.com/ndownloader/files/31079763)
Supplement: Supplementary file 3 [file 31079763]

**A**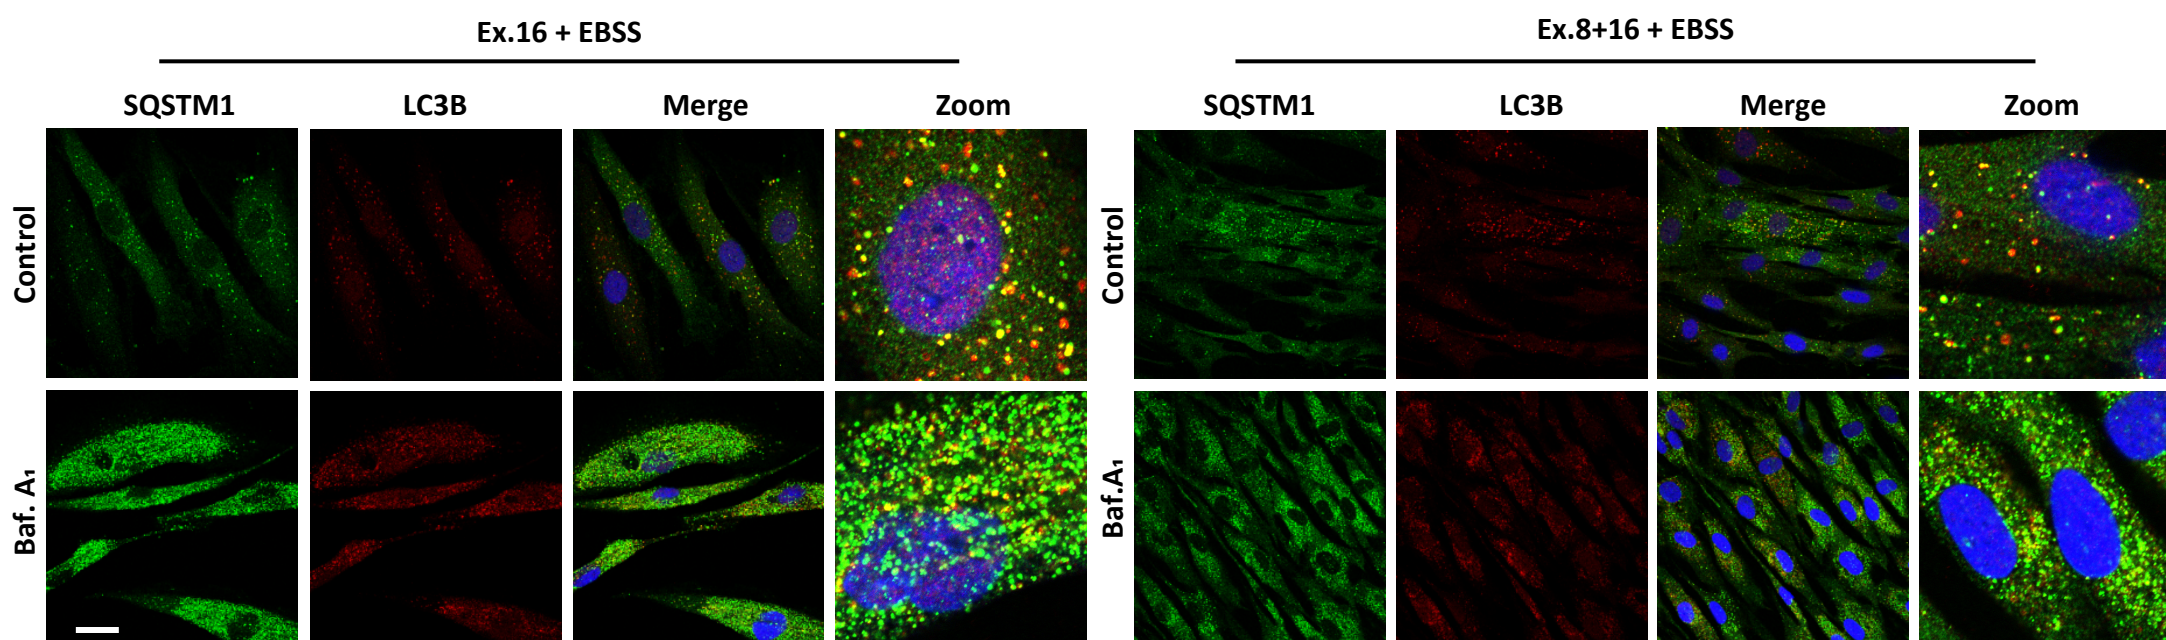**B**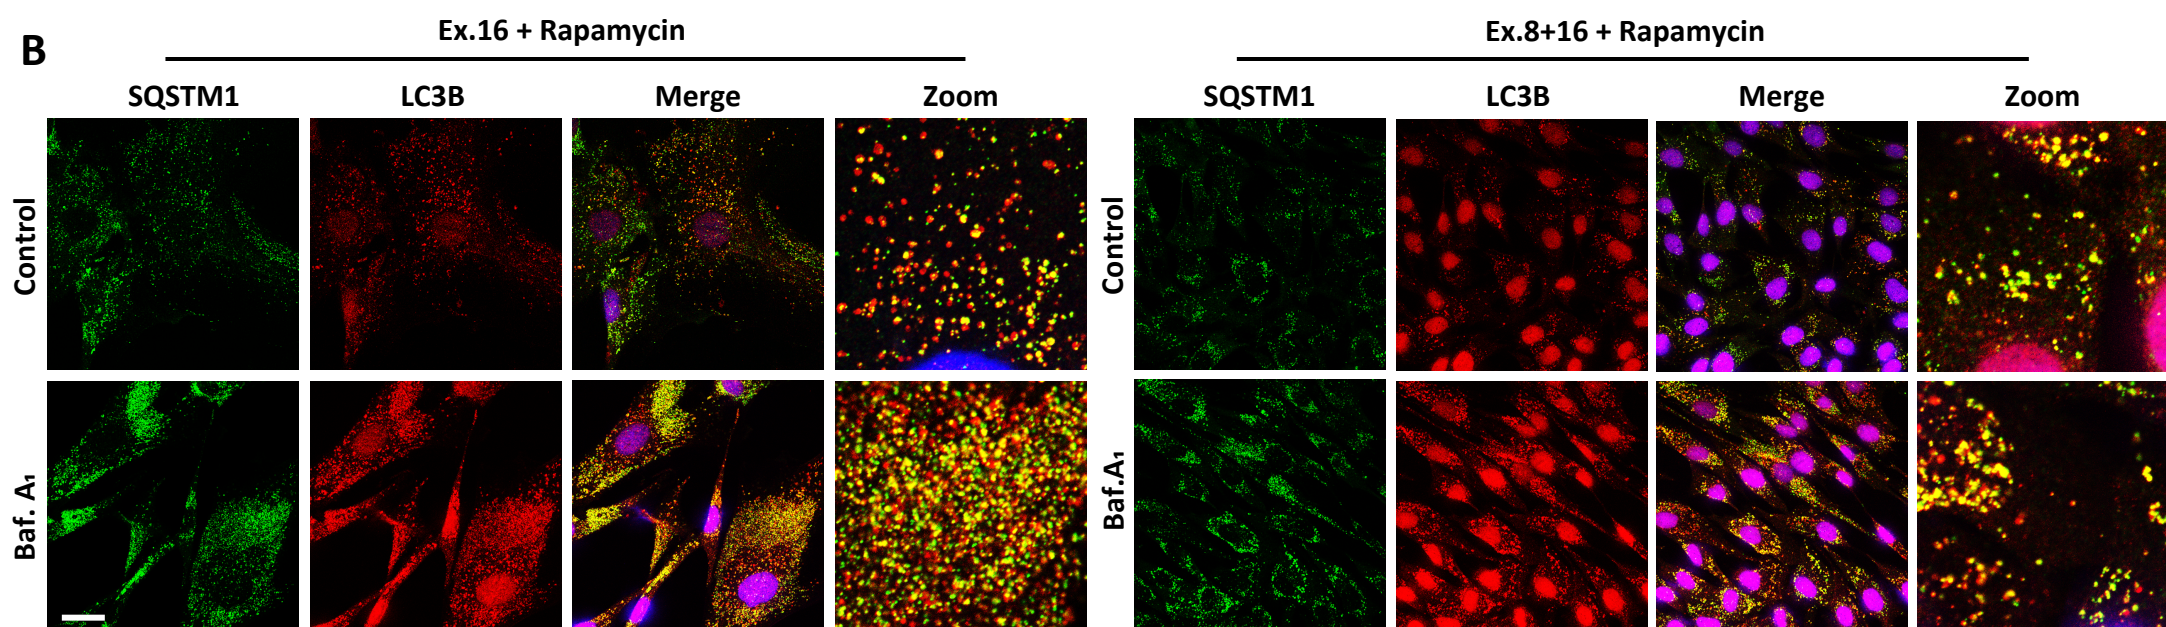

**Figure S2** - Starvation rescues autophagic flux in fibroblasts of SPG49 patients. Visual assessment of autophagy markers in primary fibroblasts cells derived from SPG49 patients. Cells were switched to starvation medium ("EBSS") (**A**) or treated with rapamycin (**B**), and in addition were treated where indicate with 0.1  $\mu$ M bafilomycin A<sub>1</sub>. After 4 h, cells were fixed with methanol, immunostained for LC3B and SQSTM1 and analyzed by confocal microscopy. Scale bar: 20  $\mu$ m.
